# Supplementary material
Source: HighWire-hosted journal article supplement (https://bmjopenquality.bmj.com/highwire/filestream/136044/field_highwire_adjunct_files/1/ds3330.docx)
Supplement: ds3330.docx [file ds3330.docx]

**PDSA Cycle [Number]**

**Aim:** what are you trying to accomplish?

Improve time to ECG to meet the target of 10 minutes from registration

**Plan:** what will your test be?

Trial a week of a dedicated cubicle for investigations including ECGs.

**Prediction:** what do you think will happen as a result of your test?

There will be a higher proportion of ECGs recorded for patients triaged with chest pain in less than 10 minutes

**Do:** what happened when you carried out your test?

The proportion of ECGs in less than 10 minutes remained at 50%.There were still issues around triage, with some patients presenting with STEMI still mis-triaged and having a prolonged wait for triage

**Study:** how did the results of your test compare with predictions?

the issue of patients under-triaged and therefore having a prolonged wait for an ECG was not improved.

**Act:** how will you change your previous test in light of what you have learned?

Change the process to have an ECG recorded as soon as the patient books on at reception complaining of chest pain. The ECG will be shown to medical staff immediately.
